# Supplementary material for: Seed Oil from Mediterranean Aromatic and Medicinal Plants of the Lamiaceae Family as a Source of Bioactive Components with Nutritional
Source: PubMed Central journal article supplement (PMC7346175; doi:10.3390/antiox9060510), 2020-06-10
Supplement: antioxidants-09-00510-s001.pdf [file antioxidants-09-00510-s001.pdf]

# **Seed Oil from Mediterranean Aromatic and Medicinal Plants of the Lamiaceae as a Source of Bioactive Components with Nutritional**

María Quílez<sup>1</sup>, Federico Ferreres<sup>2</sup>, Santiago López-Miranda<sup>2</sup>, Eva Salazar<sup>2</sup>, María J. Jordán<sup>1\*</sup>

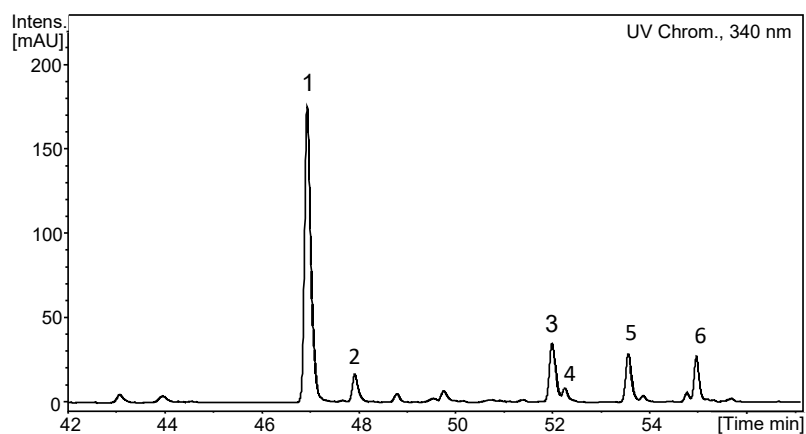

Figure S1. HPLC-UV (340 nm) profile of polyphenolic compounds identified in *L. latifolia* oil seeds.

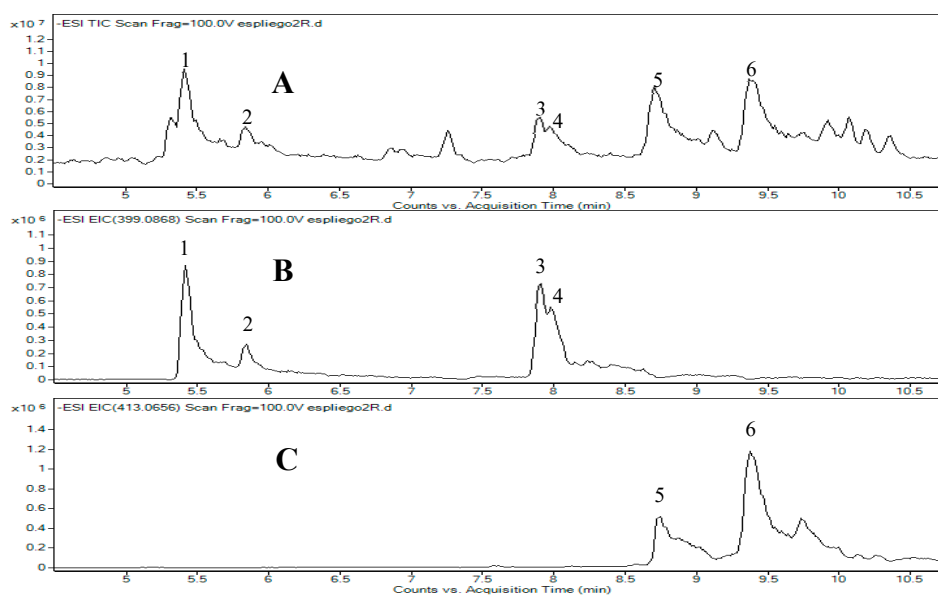

Figure S2. A) Total Ion Chromatogram (TIC) of phenolic compounds from *L. latifolia* oil seeds. Extracted Ion Chromatogram (EIC) of [M-H]<sup>-</sup> (m/z): B) 399.0868. C) 413.0656.
